# Supplementary material for: Development of Novel Patient-Reported Outcome (PRO) and Observer-Reported Outcome (ObsRO) Instruments in Retinitis Pigmentosa (RP) and Leber Congenital Amaurosis (LCA): ViSIO-PRO and ViSIO-ObsRO
Source: PubMed Central journal article supplement — Ophthalmol Ther. 2023 May 21;12(4):2069–85. doi: 10.1007/s40123-023-00724-x (PMC10287847; doi:10.1007/s40123-023-00724-x), 2023-05-21
Supplement: 40123_2023_724_MOESM1_ESM.pdf [file 40123_2023_724_MOESM1_ESM.pdf]

1 **Title**

2 Development of novel patient-reported outcome (PRO) and observer-reported outcome (ObsRO)  
3 instruments in Retinitis Pigmentosa (RP) and Leber Congenital Amaurosis (LCA): ViSIO-PRO and ViSIO-  
4 ObsRO

5

6 **Authors**

7 Isabelle Audo<sup>1</sup>, Francesco Patalano<sup>2</sup> (ORCID: 0000-0001-7015-6084), Christel Naujoks<sup>2</sup> (ORCID: 0000-  
8 0002-3799-6521), Claudio Spera<sup>2</sup>, M. Dominik Fischer<sup>3-5</sup>, Jane Green<sup>6</sup>, Christine Kay<sup>7</sup>, Todd Durham<sup>8</sup>  
9 (ORCID: 0000-0002-0363-0329), Nicola Williamson<sup>9</sup>, Helena Bradley<sup>9</sup>, Melissa Barclay<sup>9</sup>, Kieran  
10 Boparai<sup>9</sup>, Judit Banhazi<sup>2</sup>

11

12 **Affiliations**

13 <sup>1</sup>Sorbonne Université, INSERM, CNRS, Institut de la Vision, CHNO des Quinze-Vingts, National Rare  
14 Disease Center REFERET and INSERM-DGOS CIC 1423, F-75012 Paris, France;

15 <sup>2</sup>Novartis Pharma AG, Basel, Switzerland;

16 <sup>3</sup>University of Oxford, Department of Clinical Neurosciences, Oxford, UK

17 <sup>4</sup>Oxford Eye Hospital, Oxford University Hospitals NHS Foundation Trust, Oxford, UK

18 <sup>5</sup>Centre for Ophthalmology, University Hospital Tuebingen, Tuebingen, Germany;

19 <sup>6</sup>Discipline of Genetics, Faculty of Medicine, Memorial University of Newfoundland, Craig L Dobbin  
20 Genetics Research Centre, St. John's, Canada;

21 <sup>7</sup>Vitreoretinal Associates, Gainesville, Florida, USA;

22 <sup>8</sup>Foundation Fighting Blindness, Columbia, Maryland, USA;

23 <sup>9</sup>Adelphi Values Ltd, Cheshire, UK.

24

25 **Corresponding Author:** Helena Bradley, [helena.bradley@adelphivalues.com](mailto:helena.bradley@adelphivalues.com)

26

27 **Supplementary material**

**Supplementary Table 1. Ovid literature search strategy\***

| Search type                       | Search terms                                                                                                                                                                                                                                                                                                                                                                                  |
|-----------------------------------|-----------------------------------------------------------------------------------------------------------------------------------------------------------------------------------------------------------------------------------------------------------------------------------------------------------------------------------------------------------------------------------------------|
| <b>Disease-related terms</b>      | Bothnia retinal dystrophy OR fundus albipunctatus OR newfoundland rod-cone dystrophy OR retinitis punctata albescens AND retinitis pigmentosa                                                                                                                                                                                                                                                 |
| <b>Concepts of interest</b>       | quality of life OR disability OR morbidity OR mortality OR epidemiology OR prevalence OR incidence OR risk factor OR co-morbid OR pattern OR trend OR estimate OR project OR extrapolate OR hospitalisation OR drug utility OR resource utility OR length of stay OR emergency room OR emergency department OR economic OR cost OR expense OR work OR productive OR present OR absent OR loss |
| <b>Qualitative research terms</b> | visual activities questionnaire AND patient reported outcome OR Quality adjusted life years OR Disability adjusted life years OR preference OR questionnaire OR scale OR score OR satisfaction OR utility                                                                                                                                                                                     |

\*Limits applied (English, human)

28

**Supplementary Table 2. Search to identify qualitative literature in the RP/LCA population**

| Search type                   | Search terms                                                                                                                                                                                                                                                                                                                                                                                                                                                                                                                    |
|-------------------------------|---------------------------------------------------------------------------------------------------------------------------------------------------------------------------------------------------------------------------------------------------------------------------------------------------------------------------------------------------------------------------------------------------------------------------------------------------------------------------------------------------------------------------------|
| <b>Disease-specific terms</b> | retinitis pigmentosa OR RPGR OR retinitis pigmentosa GTPase regulator OR bothnia dystrophy OR newfoundland rod-cone dystrophy OR <i>RLBP1</i> RP OR <i>RLBP1</i> retinitis pigmentosa OR <i>RLBP1</i> OR <i>RPE65</i> RP OR RPE65-mediated inherited retinal dystrophy OR RPE65-mediated inherited retinal disease OR RPE65-mediated inherited retinal degeneration OR RPE65-mediated inherited retinal disorder OR usher syndrome OR bardet-biedl syndrome OR laurence-moon syndrome OR laurence-moon-bardet-biedl syndrome OR |

**Supplementary Table 2. Search to identify qualitative literature in the RP/LCA population**

| Search type                           | Search terms                                                                                                                                                                                                                                                                                                                                                                            |
|---------------------------------------|-----------------------------------------------------------------------------------------------------------------------------------------------------------------------------------------------------------------------------------------------------------------------------------------------------------------------------------------------------------------------------------------|
|                                       | bassen-kornzweig syndrome OR refsum disease OR refsum syndrome OR<br>NARP syndrome OR neuropathy ataxia retinitis pigmentosa OR leber<br>congenital amaurosis OR alstrom syndrome OR early childhood-onset<br>retinitis pigmentosa OR severe early childhood onset retinal dystrophy OR<br>early childhood onset severe retinal dystrophy                                               |
| <b>Qualitative<br/>research terms</b> | qualitative OR hermeneutic OR interview OR delphi OR focus group OR<br>phenomenology OR ethnography OR grounded theory OR thematic analysis<br>AND exp OR qualitative research OR qualitative analysis OR exp interview OR<br>interviewers OR interviewing OR interviews as topic OR exp focus groups OR<br>exp phenomenology OR ethnography OR grounded theory OR thematic<br>analysis |

**Supplementary Table 3. Publications used in RLBP1 RP qualitative and instrument review**

| <b>Publication</b>                                                                                                                                                                                                                                                               |
|----------------------------------------------------------------------------------------------------------------------------------------------------------------------------------------------------------------------------------------------------------------------------------|
| Sloane, M. E., Ball, K., Owsley, C., Bruni, J. R. and Roenker, D. L. (1992) The Visual Activities Questionnaire: Developing an instrument for assessing problems in everyday visual tasks. In Paper Presented to the Topical meeting of the Optical Society of America, America. |
| Maw, M. A., Kennedy, B., Knight, A., Bridges, R., Roth, K. E., Mani, E. J., et al. (1997) Mutation of the gene encoding cellular retinaldehyde-binding protein in autosomal recessive retinitis pigmentosa. <i>Nat Genet</i> , 17(2), pp. 198-200.                               |
| Mills, R. P. (1998) Correlation of quality of life with clinical symptoms and signs at the time of glaucoma diagnosis. <i>Trans Am Ophthalmol Soc</i> , 96, pp. 753-812.                                                                                                         |
| Botelho, P. J., Blinder, K. J. and Shahinfar, S. (1999) Familial occurrence of retinitis punctata albescens and congenital sensorineural deafness. <i>Am J Ophthalmol</i> , 128(2), pp. 246-7.                                                                                   |
| Burstedt, M. S., Sandgren, O., Holmgren, G. and Forsman-Semb, K. (1999) Bothnia dystrophy caused by mutations in the cellular retinaldehyde-binding protein gene (RLBP1) on chromosome 15q26. <i>Invest Ophthalmol Vis Sci</i> , 40(5), pp. 995-1000.                            |
| Flynn, M. F. and Bohnert, D. (1999) Fundus albipunctatus and other flecked retina syndromes. <i>J Am Optom Assoc</i> , 70(9), pp. 571-80.                                                                                                                                        |
| Friedburg, C., Serey, L., Sharpe, L. T., Trauzettel-Klosinski, S. and Zrenner, E. (1999) Evaluation of the Night Vision Spectacles on patients with impaired night vision. <i>Graefes Arch Clin Exp Ophthalmol</i> , 237(2), pp. 125-36.                                         |
| Morimura, H., Berson, E. L. and Dryja, T. P. (1999) Recessive mutations in the RLBP1 gene encoding cellular retinaldehyde-binding protein in a form of retinitis punctata albescens. <i>Invest Ophthalmol Vis Sci</i> , 40(5), pp. 1000-4.                                       |

Granse, L., Abrahamson, M., Ponjavic, V. and Andreasson, S. (2001) Electrophysiological findings in two young patients with Bothnia dystrophy and a mutation in the RLBP1 gene. *Ophthalmic Genet*, 22(2), pp. 97-105.

Janz, N. K., Wren, P. A., Lichter, P. R., Musch, D. C., Gillespie, B. W., Guire, K. E., et al. (2001) The Collaborative Initial Glaucoma Treatment Study: interim quality of life findings after initial medical or surgical treatment of glaucoma. *Ophthalmology*, 108(11), pp. 1954-65.

Katsanis, N., Shroyer, N. F., Lewis, R. A., Cavender, J. C., Al-Rajhi, A. A., Jabak, M., et al. (2001) Fundus albipunctatus and retinitis punctata albescens in a pedigree with an R150Q mutation in RLBP1. *Clin Genet*, 59(6), pp. 424-9.

Chen, M. S., Chang, C. C., Fan, I. M., Cheng, M. S. and Hou, P. K. (2002) Application of a laser flare-cell meter to examine blood-aqueous barrier function in a patient with retinitis punctata albescens. *J Formos Med Assoc*, 101(9), pp. 669-71.

Eichers, E. R., Green, J. S., Stockton, D. W., Jackman, C. S., Whelan, J., McNamara, J. A., et al. (2002) Newfoundland rod-cone dystrophy, an early-onset retinal dystrophy, is caused by splice-junction mutations in RLBP1. *Am J Hum Genet*, 70(4), pp. 955-64.

Khairallah, M., Messaoud, R., Zaouali, S., Ben Yahia, S., Ladjimi, A. and Jenzri, S. (2002) Posterior segment changes associated with posterior microphthalmos. *Ophthalmology*, 109(3), pp. 569-74.

Brown, M. M., Brown, G. C., Sharma, S. and Busbee, B. (2003) Quality of life associated with visual loss: a time tradeoff utility analysis comparison with medical health states. *Ophthalmology*, 110(6), pp. 1076-81.

Demirci, F. Y., Rigatti, B. W., Mah, T. S. and Gorin, M. B. (2004) A novel compound heterozygous mutation in the cellular retinaldehyde-binding protein gene (RLBP1) in a patient with retinitis punctata albescens. *Am J Ophthalmol*, 138(1), pp. 171-3.

Fishman, G. A., Roberts, M. F., Derlacki, D. J., Grimsby, J. L., Yamamoto, H., Sharon, D., et al. (2004) Novel mutations in the cellular retinaldehyde-binding protein gene (RLBP1) associated with

|                                                                                                                                                                                                                                                                       |
|-----------------------------------------------------------------------------------------------------------------------------------------------------------------------------------------------------------------------------------------------------------------------|
| retinitis punctata albescens: evidence of interfamilial genetic heterogeneity and fundus changes in heterozygotes. <i>Arch Ophthalmol</i> , 122(1), pp. 70-5.                                                                                                         |
| Zhang, X., Wen, F., Hu, S., Yan, H. and Lin, S. (2004) Fundus angiography findings of atypical retinitis pigmentosa. <i>Chinese Ophthalmic Research.</i> , 22(3), pp. 299-301.                                                                                        |
| Burstedt, M. S., Monestam, E. and Sandgren, O. (2005) Associations between specific measures of vision and vision-related quality of life in patients with bothnia dystrophy, a defined type of retinitis pigmentosa. <i>Retina</i> , 25(3), pp. 317-23.              |
| Nakamura, M., Lin, J., Ito, Y. and Miyake, Y. (2005) Novel mutation in RLBP1 gene in a Japanese patient with retinitis punctata albescens. <i>Am J Ophthalmol</i> , 139(6), pp. 1133-5.                                                                               |
| Hartong, D. T., Berson, E. L. and Dryja, T. P. (2006) Retinitis pigmentosa. <i>Lancet</i> , 368(9549), pp. 1795-809.                                                                                                                                                  |
| Humbert, G., Delettre, C., Senechal, A., Bazalgette, C., Barakat, A., Bazalgette, C., et al. (2006) Homozygous deletion related to Alu repeats in RLBP1 causes retinitis punctata albescens. <i>Invest Ophthalmol Vis Sci</i> , 47(11), pp. 4719-24.                  |
| Owsley, C., McGwin, G., Jackson, G. R., Heimburger, D. C., Piyathilake, C. J., Klein, R., et al. (2006a) Effect of short-term, high-dose retinol on dark adaptation in aging and early age-related maculopathy. <i>Invest Ophthalmol Vis Sci</i> , 47(4), pp. 1310-8. |
| Owsley, C., McGwin, G., Jr., Scilley, K. and Kallies, K. (2006b) Development of a questionnaire to assess vision problems under low luminance in age-related maculopathy. <i>Invest Ophthalmol Vis Sci</i> , 47(2), pp. 528-35.                                       |
| Jonsson, A. C., Burstedt, M. S., Golovleva, I. and Sandgren, O. (2007) Tinted contact lenses in Bothnia dystrophy. <i>Acta Ophthalmol Scand</i> , 85(5), pp. 534-9.                                                                                                   |
| Massof, R. W. (2007) An interval-scaled scoring algorithm for visual function questionnaires. <i>Optom Vis Sci</i> , 84(8), pp. 689-704.                                                                                                                              |

Mathew, R., Lord, S., Beaumont, P., Vaegan and Herse, P. (2007) The impact of age-related macular degeneration on quality of life in American Academy of Optometry: American Optometric Foundation.

Owsley, C., McGwin, G., Jr., Jackson, G. R., Kallies, K. and Clark, M. (2007) Cone- and rod-mediated dark adaptation impairment in age-related maculopathy. *Ophthalmology*, 114(9), pp. 1728-35.

Burstedt, M. S., Sandgren, O., Golovleva, I. and Wachtmeister, L. (2008) Effects of prolonged dark adaptation in patients with retinitis pigmentosa of Bothnia type: an electrophysiological study. *Doc Ophthalmol*, 116(3), pp. 193-205.

Hahm, B. J., Shin, Y. W., Shim, E. J., Jeon, H. J., Seo, J. M., Chung, H., et al. (2008) Depression and the vision-related quality of life in patients with retinitis pigmentosa. *Br J Ophthalmol*, 92(5), pp. 650-4.

Finger, R. P., Kleinemas, U., Lamoureaux, E. L., Owsley, C., Scholl, H. P. N. and Holz, F. G. (2009) Adaptation and evaluation of the German version of the impact of vision profile (IVI) and the low luminance questionnaire (LLQ) in Geographic Atrophy in Age-Related Macular Degeneration. *Journal Francais d'Ophthalmologie*, 32(S1), pp. 137-138.

Gothwal, V. K., Wright, T. A., Lamoureux, E. L. and Pesudovs, K. (2009) Visual Activities Questionnaire: assessment of subscale validity for cataract surgery outcomes. *J Cataract Refract Surg*, 35(11), pp. 1961-9.

Wren, P. A., Musch, D. C., Janz, N. K., Niziol, L. M., Guire, K. E., Gillespie, B. W., et al. (2009) Contrasting the use of 2 vision-specific quality of life questionnaires in subjects with open-angle glaucoma. *J Glaucoma*, 18(5), pp. 403-11.

Assessment of Everyday Visual Tasks in Carriers of X-Linked Retinitis Pigmentosa: Use of the Visual Activities and Low Luminance Questionnaire (2010) Association for Research in Vision and Ophthalmology. Available:

<http://www.abstractsonline.com/plan/ViewAbstract.aspx?mID=2511&sKey=088c3f6a-90da-4c69->

a1d4-4ef8c84ca022&cKey=2e45bfbe-5655-4997-aaf4-83542ec680ad&mKey=1ea90e66-c548-49e0-9f05-30da7938d511.

Burstedt, M. S. and Monestam, E. (2010) Self-reported quality of life in patients with retinitis pigmentosa and maculopathy of Bothnia type. *Clin Ophthalmol*, 4, pp. 147-54.

Genead, M. A., Fishman, G. A. and Lindeman, M. (2010) Spectral-domain optical coherence tomography and fundus autofluorescence characteristics in patients with fundus albipunctatus and retinitis punctata albescens. *Ophthalmic Genet*, 31(2), pp. 66-72.

Sugawara, T., Hagiwara, A., Hiramatsu, A., Ogata, K., Mitamura, Y. and Yamamoto, S. (2010) Relationship between peripheral visual field loss and vision-related quality of life in patients with retinitis pigmentosa. *Eye (Lond)*, 24(4), pp. 535-9.

Finger, R. P., Fenwick, E., Owsley, C., Holz, F. G. and Lamoureux, E. L. (2011) Visual functioning and quality of life under low luminance: evaluation of the German Low Luminance Questionnaire. *Invest Ophthalmol Vis Sci*, 52(11), pp. 8241-9.

McAlinden, C., Gothwal, V. K., Khadka, J., Wright, T. A., Lamoureux, E. L. and Pesudovs, K. (2011) A head-to-head comparison of 16 cataract surgery outcome questionnaires. *Ophthalmology*, 118(12), pp. 2374-81.

Naz, S., Ali, S., Riazuddin, S. A., Farooq, T., Butt, N. H., Zafar, A. U., et al. (2011) Mutations in RLBP1 associated with fundus albipunctatus in consanguineous Pakistani families. *Br J Ophthalmol*, 95(7), pp. 1019-24.

Frick, K. D., Roebuck, M. C., Feldstein, J. I., McCarty, C. A. and Grover, L. L. (2012) Health services utilization and cost of retinitis pigmentosa. *Arch Ophthalmol*, 130(5), pp. 629-34.

Golovleva, I. and Burstedt, M. (2012) Retinitis Pigmentosa in Northern Sweden – From Gene to Treatment. in *Advances in Ophthalmology: IntechOpen*. pp. 451-472.

Nojima, K., Hosono, K., Zhao, Y., Toshiba, T., Hikoya, A., Asai, T., et al. (2012) Clinical features of a Japanese case with Bothnia dystrophy. *Ophthalmic Genet*, 33(2), pp. 83-8.



Van Genderen, M. M., K.W., L., M.J., V. S., F.C.C., R., J.E.E., K., A.I., D. H., et al. (2012) Genotypes and phenotypes in fundus albipunctatus and retinitis punctata albescens. In Paper Presented to the 50th ISCEV international symposium.

Yamamoto, S., Sugawara, T., Murakami, A., Nakazawa, M., Nao, I. N., Machida, S., et al. (2012) Topical isopropyl unoprostone for retinitis pigmentosa: microperimetric results of the phase 2 clinical study. *Ophthalmol Ther*, 1(1), pp. 5.

Chacon-Lopez, H., Pelayo, F. J., Lopez-Justicia, M. D., Morillas, C. A., Urena, R., Chacon-Medina, A., et al. (2013) Visual training and emotional state of people with retinitis pigmentosa. *J Rehabil Res Dev*, 50(8), pp. 1157-68.

Crossland, M., Rubin, G. and Tufail, A. (2013) Dark-adapted visual function in dry age-related macular disease. in.

Dessalces, E., Bocquet, B., Bourien, J., Zanlonghi, X., Verdet, R., Meunier, I., et al. (2013) Early-onset foveal involvement in retinitis punctata albescens with mutations in RLBP1. *JAMA Ophthalmol*, 131(10), pp. 1314-23.

Kim, S., Shin, D. W., An, A. R., Lee, C. H., Park, J. H., Park, J. H., et al. (2013) Mental health of people with retinitis pigmentosa. *Optom Vis Sci*, 90(5), pp. 488-93.

An, A. R., Shin, D. W., Kim, S., Lee, C. H., Park, J. H., Park, J. H., et al. (2014) Health behaviors of people with retinitis pigmentosa in the republic of Korea. *Ophthalmic Epidemiol*, 21(5), pp. 279-86.

Blindness, P. (2014) The Economic Burden of Vision Loss and Eye Disorders in the United States, Available: <http://costofvision.preventblindness.org/costs/loss-of-wellbeing/quality-adjusted-life-years-qalys> [Accessed 09/03/2015].

Flamendorf, J., Argon, E., Al-Holou, S., Wiley, H., Wong, W. T., Chew, E. Y., et al. (2014) Impairment in Dark Adaptation is Associated with Age-Related Macular Degeneration Severity and Reticular Drusen. in Association for Research in Vision and Ophthalmology.

Hipp, S., Zobor, G., Glockle, N., Mohr, J., Kohl, S., Zrenner, E., et al. (2014) Phenotype variations of retinal dystrophies caused by mutations in the RLBP1 gene. *Acta Ophthalmol.*

Orphanet.net (2014) Retinitis Pigmentosa, Available: [http://www.orpha.net/consor/cgi-bin/OC\\_Exp.php?Lng=GB&Expert=791.0](http://www.orpha.net/consor/cgi-bin/OC_Exp.php?Lng=GB&Expert=791.0) [Accessed 03/04/2015 2014].

**Supplementary Table 4. Publications selected for full-text review in the RP/LCA population**

| <b>Publication</b>                                                                                                                                                                                                                                                                                      |
|---------------------------------------------------------------------------------------------------------------------------------------------------------------------------------------------------------------------------------------------------------------------------------------------------------|
| Hayeems RZ, Geller G, Finkelstein D, Faden R. How patients experience progressive loss of visual function: a model of adjustment using qualitative methods. <i>British Journal of Ophthalmology</i> . 2005;89(5):615-620.                                                                               |
| Fourie RJ. A qualitative self-study of retinitis pigmentosa. <i>British Journal of Visual Impairment</i> . 2007;25(3):217-232.                                                                                                                                                                          |
| Bittner AK, Diener-West M, Dagnelie G. A survey of photopsias in self-reported retinitis pigmentosa: location of photopsias is related to disease severity. <i>Retina (Philadelphia, Pa)</i> . 2009;29(10):1513.                                                                                        |
| Bittner AK, Edwards L, George M. Coping strategies to manage stress related to vision loss and fluctuations in retinitis pigmentosa. <i>Optometry-Journal of the American Optometric Association</i> . 2010;81(9):461-468.                                                                              |
| Simarasl Y. Challenges of Retinitis Pigmentosa (RP) Patients in Iran and Sweden (A Comparative Study). 2012.                                                                                                                                                                                            |
| Figueiredo MZ, Chiari BM, Goulart BN. Communication in deafblind adults with Usher syndrome: retrospective observational study. <i>CoDAS</i> . 2013;25(4):319-324.                                                                                                                                      |
| Ming ST. RP Doesn't Mean Loss of All. Paper presented at: Retina International World Congress 2016; Taipei Taiwan.                                                                                                                                                                                      |
| Piscopo A, Roborel De Climens A, Brun-Strang C, Buggage R, Barbosa CD, Knoble N. Living with Usher's syndrome Type 1: Development of a disease impact model from qualitative interviews with patients and their parents. <i>Investigative Ophthalmology and Visual Science Conference</i> . 2017;58(8). |
| Senthil MP, Khadka J, Gilhotra JS, Simon S, Pesudovs K. Exploring the quality of life issues in people with retinal diseases: a qualitative study. <i>Journal of patient-reported outcomes</i> . 2017a;1(1):15.                                                                                         |

Senthil M, P., Khadka J, Pesudovs K. Seeing through their eyes: Lived experiences of people with retinitis pigmentosa. *Eye (Basingstoke)*. 2017b;31(5):741-748.
